# Supplementary material for: Ultraviolet Radiation-Induced Production of Nitric Oxide:A multi-cell and multi-donor analysis
Source: PubMed Central journal article supplement (PMC5593895; doi:10.1038/s41598-017-11567-5), 2017-09-11

**Ultraviolet Radiation-Induced Production of Nitric Oxide:  
A multi-cell and multi-donor analysis**

Graham Holliman<sup>1\*</sup>, Donna Lowe<sup>1</sup>, Howard Cohen<sup>2</sup>, Sarah Felton<sup>3</sup> and Ken Raj<sup>1</sup>

<sup>1</sup> Radiation Effects Department, Centre for Radiation, Chemical and Environmental Hazards, Public Health England (PHE), Chilton, Oxfordshire, OX11 0RQ United Kingdom

<sup>2</sup> Elizabeth House, 515 Limpsfield Road, Warlingham, Surrey, CR6 9LF

<sup>3</sup> Oxford University Hospitals NHS Foundation Trust, Old Road, Oxford, OX3 7LJ

\* Corresponding Author

[Graham.Holliman@phe.gov.uk](mailto:Graham.Holliman@phe.gov.uk)

CRCE, PHE,

Chilton,

Oxfordshire,

OX11 0RQ

Tel: 01235 825125

Short Title : UV-A and NO in human skin cells

# Supplementary Figure 1

Complete scans of western blot membranes that were cropped for inclusion in Figure 1a

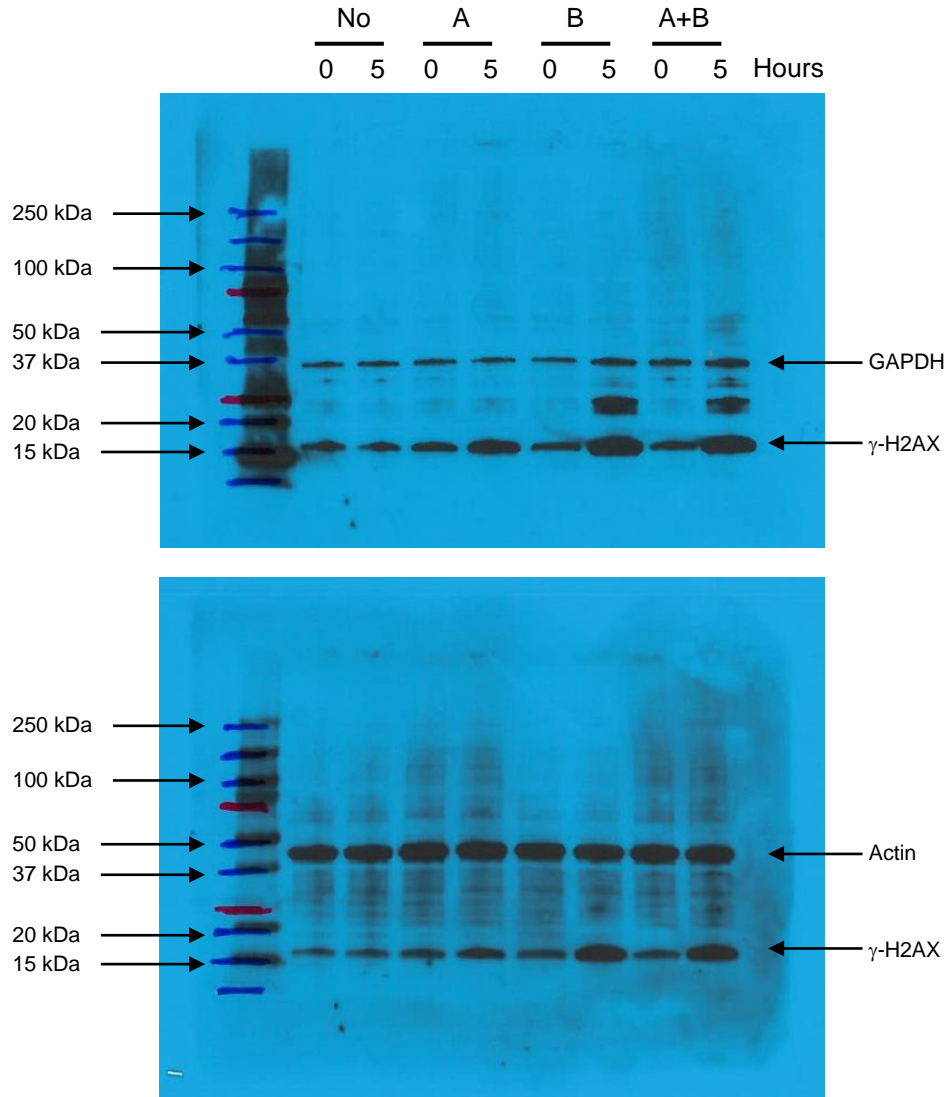

## Supplementary Figure 2

Output spectra of BIO-SUN system and Honle solar simulator.

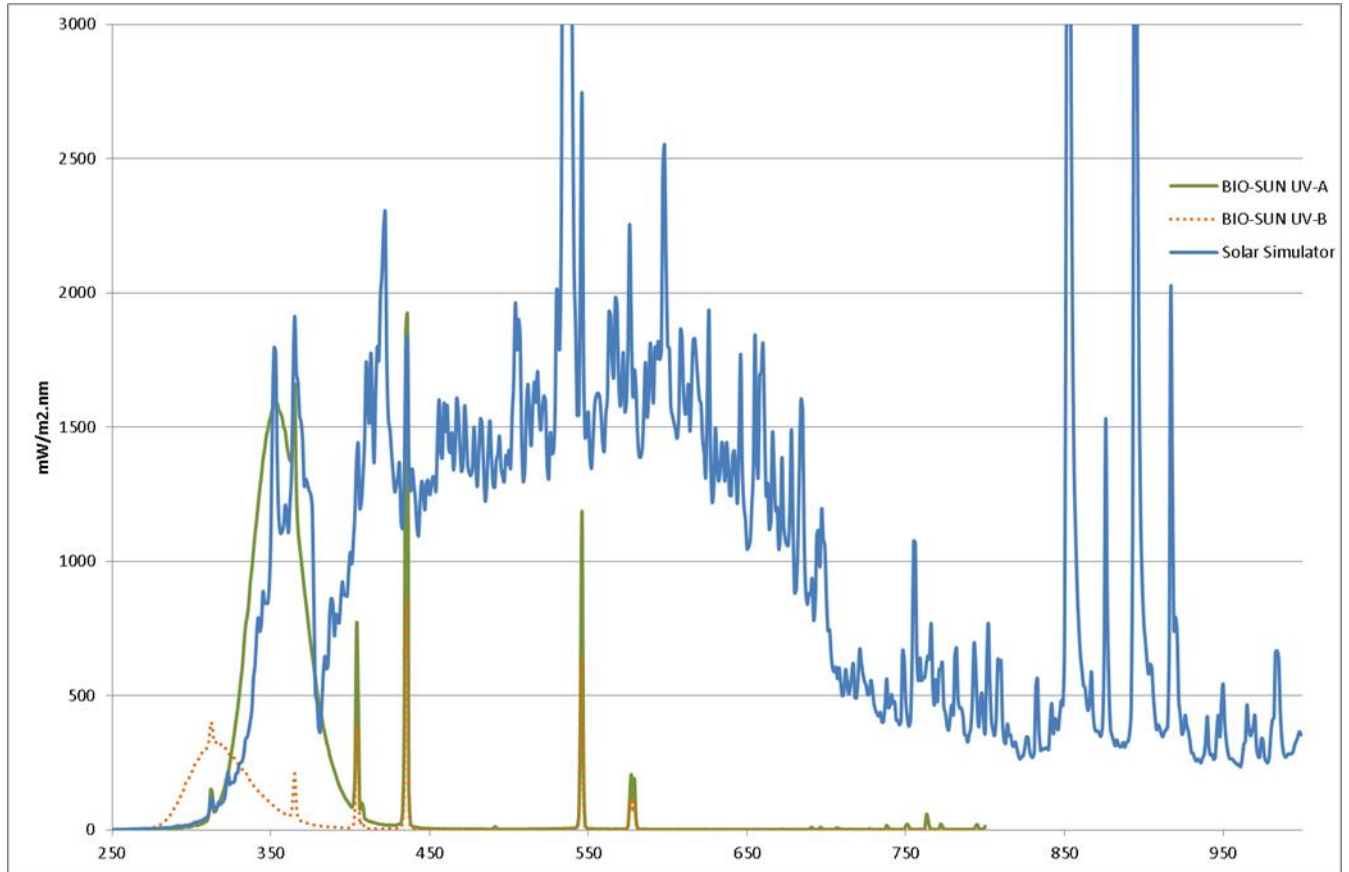

Supplement: 41598_2017_11567_MOESM1_ESM.pdf [file 41598_2017_11567_MOESM1_ESM.pdf]
